# Supplementary material
Source: publisher figshare collection journal article supplement (https://karger.figshare.com/articles/dataset/_/11865117)
Supplement: Supplementary file 1 [file 1]

## Genetic (জন্মগত উপাদান সম্বন্ধীয়) study -এর উপর প্রশ্নমালা

Subject ID :

TW. ID :

Age :

(সাক্ষাৎকার গ্রহণকারীর প্রতি নির্দেশ : আপনার পরিচয় দিন এবং Respondent list-এর সাথে স্বাস্থ্য Card এর Res ID মিলিয়ে Respondent-এর পরিচয় সম্পর্কে নিশ্চিত হয়ে নিন। সাক্ষাৎকার গ্রহণের উদ্দেশ্য বুঝিয়ে বলুন।

১. সাক্ষাৎকার প্রদানকারীর:

নাম :..... পুরুষ/মহিলা

স্বামী/পিতার নাম :..... মোবাইল নং- .....

২. আপনি কতদূর পর্যন্ত পড়াশোনা করেছেন?

.....বছর

[আমরা জানি যে, খাবার পানি ও রান্নার পানির সাথে আমাদের শরীরে যে আর্সেনিক প্রবেশ করে তার অধিকাংশ প্রস্রাবের মাধ্যমে বের হয়ে যায়। প্রস্রাবের সাথে আর্সেনিক বের হওয়ার মাত্রা সবার একরকম নয়। কারো প্রস্রাবের সাথে বেশী বের হয়, কারো কম বের হয়; এটা নির্ভর করে Genetic (জন্মগত উপাদান)-এর উপর। Genetic (জন্মগত উপাদান)-এর কারণে একজন মানুষের শরীর কতটুকু আর্সেনিক ধারণ করতে পারে তা পরীক্ষা নিরীক্ষার মাধ্যমে জানা সম্ভব। যেহেতু আর্সেনিক শরীরের জন্য ক্ষতিকর, এটি ক্যান্সার, হৃদরোগ, স্ট্রোক এবং মৃত্যুর ঝুঁকি বাড়ায়, সেহেতু যাদের শরীর আর্সেনিক জনিত Genetic (জন্মগত উপাদান)-এর সাথে সম্পর্কযুক্ত তারা অন্যদের তুলনায় বেশী ঝুঁকিপূর্ণ।

[এখন আমি আপনাকে কিছু প্রশ্ন জিজ্ঞাসা করব। দয়া করে প্রশ্নগুলোর সঠিক উত্তর দিবেন।]

৩. আপনি কি জানেন দীর্ঘদিন আর্সেনিকযুক্ত পানি পান করলে বিভিন্ন স্বাস্থ্য সমস্যা দেখা দেয় ?

1= হ্যাঁ

2= না

৪. আপনার জিন আর্সেনিক বিষক্রিয়ার সাথে যুক্ত কি-না, তা জানতে আপনি কি আগ্রহী??

1= হ্যাঁ

2= না

৫. আপনার ব্যবহৃত টিউবওয়েলটি আর্সেনিকমুক্ত কিনা?

1= হ্যাঁ

2= না

3= জানি না

যদি আপনার টিউবওয়েলটি আর্সেনিকমুক্ত হয়ে থাকে সেক্ষেত্রে নিম্নের প্রশ্নগুলোর জন্য অধিকতর "আর্সেনিকমুক্ত" প্রযোজ্য হবে।

৬. বর্তমানে আপনার এবং আপনার পরিবারের সকলের খাবার পানি এবং রান্নার কাজে আর্সেনিকমুক্ত পানি ব্যবহারের জন্য কোন পদক্ষেপ নেয়া সম্ভব কিনা? (যেমন-নতুন নলকূপ বসানো বা অন্য কোন কম মাত্রার আর্সেনিকযুক্ত নলকূপের পানি সংগ্রহ)?

1= হ্যাঁ

2= না

৭. আপনি যদি জানেন আপনার জিন (জন্মগত উপাদান) আর্সেনিক দূষনযুক্ত, সেক্ষেত্রে আপনি আপনার পরিবারের পানির উৎস পরিবর্তনের ক্ষেত্রে প্রয়োজনীয় ব্যবস্থা গ্রহণ করবেন কিনা? (যেমন-নতুন নলকূপ বসানো বা অন্য কোন কম মাত্রার আর্সেনিকযুক্ত নলকূপের পানি ব্যবহার)?

1= হ্যাঁ

2= না

৮. আপনি যদি জানেন যে আপনার জিন (জন্মগত উপাদান) আর্সেনিকদূষনযুক্ত, সেক্ষেত্রে এ তথ্যটি আপনার পরিবারকে জানাতে রাজী আছেন কিনা?

1= হ্যাঁ

2= না

৯. আপনি যদি জানেন যে আপনার জিন (জন্মগত উপাদান) আর্সেনিকদূষনযুক্ত, সেক্ষেত্রে এ তথ্যটি আপনার পরিবার ছাড়া অন্য সবার কাছে গোপন রাখবেন কিনা?

1= হ্যাঁ

2= না

Remarks : .....

সাক্ষাৎকার গ্রহণকারীর নাম.....

তারিখ : .....
