# Supplementary material
Source: publisher figshare collection journal article supplement (https://karger.figshare.com/articles/dataset/_/11865117)
Supplement: Supplementary file 2 [file 1]

## Return of Results (Genetic) -Questionnaire

(Assessing participants' attitudes towards receiving genetic information on arsenic metabolism and toxicity risk)

Subject ID :

TW. ID :

Age :

Q1. Respondents name?..... 2. Sex: 1. Male 2.Female

Q3. How many years of formal education have you received? \_\_\_\_ years

**Background Information:** Arsenic consumed in drinking water is gradually removed from the body in urine. However, some individuals are not able to remove arsenic from their bodies as quickly as other individuals, due in part to inherited genetic factors (i.e., genes). Therefore, even though arsenic is harmful to everyone and can increase risk for cancer, cardiovascular disease, and mortality, some individuals may be more susceptible to the effects of arsenic than others.

Q4. Are you concerned about the health effects of arsenic-contaminated drinking water?

1.Yes 2.No

Q5. If your genes could provide you information on your susceptibility to arsenic toxicities, would you be interested to receive this information?

1.Yes 2.No

Q6. Is your primary water source believed to be “arsenic free”?

1.Yes 2.No 3.Dont Know

**\*\*\*if your water is currently “arsenic-free”, for the next few questions, please assume your water arsenic is low but could be further reduced to “extremely low”.**

Q7. At this point in time, is it possible for you to take steps to further reduce you and/or your family’s exposure to arsenic in water used for drinking and cooking? Such steps could include collecting water from well with lower arsenic than your current water sources, or drilling a new well.

1. Yes 2.No

Q8. If your genes indicated you (or your family members) were at elevated risk for arsenic toxicities, would this information motivate you to alter your family’s water sources to reduce your family’s arsenic exposure?

1. Yes 2.No

Q9. If your genes indicated that you were at elevated risk for arsenic toxicity, would you be comfortable disclosing this information with others in your family?

1.Yes 2.No

Q10. If your genes indicated that you were at elevated risk for arsenic toxicity, would you want to keep this information confidential from non-family members?

1.Yes 2.No

Remarks:.....

Interviewer name :

Date: .....
